# Supplementary material for: Implementation strategies to increase access and demand of long-lasting insecticidal nets: a before-and-after study and scale-up process in Mozambique
Source: Malar J. 2017 Oct 25;16:429. doi: 10.1186/s12936-017-2086-3 (PMC5679509; doi:10.1186/s12936-017-2086-3)
Supplement: Supplementary file 1 — Additional file 1: Appendix 1. Micro-planning tool. [file 12936_2017_2086_MOESM1_ESM.pdf]

### Microplanning tool for rural areas

|          |                 |
|----------|-----------------|
| District | insert the name |
|----------|-----------------|

|                                |   |
|--------------------------------|---|
| Population                     | 0 |
| Households                     | 0 |
| Number of bed nets             | 0 |
| Number of household registrars | 0 |

|                                |  |
|--------------------------------|--|
| Number of Administrative Posts |  |
|--------------------------------|--|

|                                           |   |                                                             |
|-------------------------------------------|---|-------------------------------------------------------------|
| Number of satellites warehouses           |   | Insert the number of satellites warehouses                  |
| Number of Headquarter distribution points | 0 |                                                             |
| Total number of distribution points       | 0 |                                                             |
| Number of distributors at headquarter     | 0 | <i>Tem relação com a última célula da coluna Z (Z 1519)</i> |
| Total number of distributors              | 0 | <i>Tem relação com a última célula da coluna Z (Z 1518)</i> |

Number of localities   Insert the number

| Logística de Materiais Cruciais da Campanha  |         |
|----------------------------------------------|---------|
| Number of household registration forms needs | 0       |
| Number of block of coupons needs             | 0       |
| Number of rolls of stikers needs             | 0       |
| Number of bed nets distribution form needs   | #DIV/0! |
| Number of benefited households forms needs   | #DIV/0! |
| Number of clipboards / backpacks needs       | 0       |

[illegible]
